# Supplementary material
Source: PubMed Central journal article supplement (PMC7307190)
Supplement: supp_RA119.012127_157453_3_supp_522009_q9lngs.pdf [file supp_RA119.012127_157453_3_supp_522009_q9lngs.pdf]

rsmH\_ECOLI

rsmH\_ECOLI .....MGSSHHHHHHSSGENL.....YFEGSHMA  
METTL15\_FRUITFLY .....MK...RLLNPTRLRDLWL.....  
METTL15\_ZEBRAFISH .....MPQYYSCFMAAPC.....RQTLGVWKKHVATLRNPRMFRRCWRKSWHPGRLYT  
METTL15\_CHICKEN MINSKMLSQCLC.QVNKCLLHNLKLNPIKLAALSRRRHSSVKQLS..EYE..LTEQTTQK  
METTL15\_MOUSE MLRY...PYFYRTYNRFLSFHVDSGASNLDCVPHITHTAVALHT..ESK..AVEGTALC  
METTL15\_HUMAN MLRY...PYFCRMYKECLSCWLESIGIPNLGVWPNRIHTTAEKYR..EYE..AREQTDQT

rsmH\_ECOLI

α1 β1 α2  
30 40 50 60 70 80  
rsmH\_ECOLI S...MTGGQQMGRMMENYKHTVLLDEAVNGLNIRPDGIYIDGTFGRGGHSRLTILSQLGE  
METTL15\_FRUITFLY .....RRSSIDVTTAPHVPVLCDAIEEYLOPVPGGTYFDMTFGAGGHTRRILIEKCP.  
METTL15\_ZEBRAFISH GSVSPSPDCCEMPVQEEKPFHTPVMVKEVLIQFLNIKPGQIVLDLTFGAGGHSKAITLQSVF.  
METTL15\_CHICKEN SETKK.LPDSTENKNFGRLLHVPVMMEEVVSCLSPQSGQCFLDMTFGAGGHTALILEKAS.  
METTL15\_MOUSE GPQKVYSSEEKLEAMAKLHIVVMVDQVHCLAPQKQVFLDMTFGSGGHTRAILQKEP.  
METTL15\_HUMAN QAQELHRSQDRDFETMAKLLHIVVMVDEVVHCLSPQKQVFLDMTFGSGGHTKAILQKES.

rsmH\_ECOLI

β2 α3 β3 η1 α4 β4  
90 100 110 120 130  
rsmH\_ECOLI EGRLLAIDRDPQAIATAKTIDDP...RFSIHHGPFSALEGEYVAERD.LIGKIDGILLD  
METTL15\_FRUITFLY EAKVYALDRDPLAHQLARDMSESEEFKGRLLIPLLGKFSDDLPKLFRKEHGLAKNSVDGMLFD  
METTL15\_ZEBRAFISH GVTIVYALDRDPTAFRMAQQLA...EEYQGVKPKVLRGFSLENNLLPALGLGPGLVDGALLD  
METTL15\_CHICKEN NITIVYALDRDPTAYKIAQQLS...ESYPKQIQALLGQFSQSEALLISSGVEITDGLVLLD  
METTL15\_MOUSE DVMVYALDRDPAVYALAEQLS...RLYPTQIQALLGQFSQAEALLMKAGVQPGTIDGILLD  
METTL15\_HUMAN DIVLYALDRDPTAVYALAEHLS...ELYPKQIQALLGQFSQAEALLMKAGVQPGTIDGVLMD

rsmH\_ECOLI

α5 η2 α6 α7  
140 150 160 170 180 190  
rsmH\_ECOLI LGVSSPQLDDAERGFSLRDKGPLDMRMDGGRYPDMP...SAAEWLQTAEEADIAWVLTGYGEE  
METTL15\_FRUITFLY FGCSSMQFDDEAVRGFSLSRDKGPLDMRMDGGHSGG.VTAADVLANVEEGDLVKILRRMYGEE  
METTL15\_ZEBRAFISH AGCSSMQMDSABERGFSLSKDGPLDMRMDGDRYPDMPCAADVVALDQALASVLAAYGEE  
METTL15\_CHICKEN AGCSSMQFDTPERGFSLRDKGPLDMRMDGDRYPDMP...TAADVVALDQALASILRTYGEE  
METTL15\_MOUSE LGCSSMQLDAPERGFSLRDKGPLDMRMDGDRYPDTP...TAADVVALDQALASILRTYGEE  
METTL15\_HUMAN LGCSSMQLDTPERGFSLRDKGPLDMRMDGGRYPDMP...TAADVVALDQALASILRTYGEE

rsmH\_ECOLI

α8 α9 α10  
200 210 220 230 240  
rsmH\_ECOLI RFAKRTAARIVERNR.EQPMTRTKELAEVVAATPVKD...KFKHPATRTFOAV  
METTL15\_FRUITFLY KAAKRTARGLVDARNALFKIETTKOLADLIENIMDG...GTAKDLRRPAHSATKTFQAI  
METTL15\_ZEBRAFISH RHTRRTAARIVQARS.VYPIRTRTQLASIVAGAFPASALYARRDRLQRPHVATKTFQAL  
METTL15\_CHICKEN KHAKRTASAIVQARS.IYPIRTRTQLASIVAGAFPASALYARKDRLQRPHVATKTFQAL  
METTL15\_MOUSE KHAKRTASAIVQARS.TYPIRTRTQLASIVAGAFPASAVYARKDRLQRSTHATKTFQAL  
METTL15\_HUMAN KHAKRTASAIVQARS.IYPIRTRTQLASIVAGAFPASAIYTRKDLQRSTHATKTFQAL

rsmH\_ECOLI

α11 β5 α12  
250 260 270 280 290 300  
rsmH\_ECOLI RIWVNSLEIEIQALKSSLNVLAPGGRLLISFHSLEDRIKRFMRNENSRGPQVPAAGLPM  
METTL15\_FRUITFLY RIFVNNELNEINYGMLANEILRVDGRLLVITTFHSLEDRIKRFMRNENSRGPQVPAAGLPM  
METTL15\_ZEBRAFISH RIFVNDLNLHAGLRVAQTLRLRPKGRLLVITTFHSLEDRIKRFMRNENSRGPQVPAAGLPM  
METTL15\_CHICKEN RIFVNDLNLHAGLRVAQTLRLRPKGRLLVITTFHSLEDRIKRFMRNENSRGPQVPAAGLPM  
METTL15\_MOUSE RIFVNNELNELYAGLRTAEKEELKTPGGRLLVITTFHSLEDRIKRFMRNENSRGPQVPAAGLPM  
METTL15\_HUMAN RIFVNNELNELYAGLRTAEKEELKTPGGRLLVITTFHSLEDRIKRFMRNENSRGPQVPAAGLPM

rsmH\_ECOLI

β6 α13 η3 β7  
310 320 330 340  
rsmH\_ECOLI TEEQLKKL.....GG...RQLRALGKLMPEGEEVVAENPRARSVLRITAEERT  
METTL15\_FRUITFLY .....YSSHYAIDEPDILESITKKSWKQLHRHVIVPDADAVARNTRRSAKLRAAVKT  
METTL15\_ZEBRAFISH HARARFAGQEEFEFEFEFEDEGGNSVHWVS.LKKVIKPESEEVQBNPRARSAKLRAAVRQ  
METTL15\_CHICKEN KIRQALKNCS.KEEDTHEFPHGKNSKWFIFIQKKVLTQAKDILNPRARSAKLRAAVKLL  
METTL15\_MOUSE KVKQTSQLDS.DQETEER.HSVRAPLKWELIHKKVLTPEDQDVQDNPRARSAKLRAAIKLL  
METTL15\_HUMAN QVMKTSQLGS.DHENTEEVSMRRAPLMEWELIHKKVLTPEDQDVQDNPRARSAKLRAAIKLL

rsmH\_ECOLI

rsmH\_ECOLI NA  
METTL15\_FRUITFLY N.  
METTL15\_ZEBRAFISH ..  
METTL15\_CHICKEN ..  
METTL15\_MOUSE ..  
METTL15\_HUMAN ..
